# Supplementary material for: Cerebrospinal fluid in COVID-19 neurological complications: no cytokine storm or neuroinflammation
Source: bioRxiv or medRxiv preprint supplement (doi:10.1101/2021.01.10.20249014), 2021-01-12
Supplement: Supplementary file [file media-1.pdf]

## Supplemental Data

### Cerebrospinal fluid in COVID-19 neurological complications: no cytokine storm or neuroinflammation.

Maria A. Garcia et. al.

Supplemental Tables

Supplemental Figures

Study Group Membership

| Supplemental Table 1.<br>Demographic features and CSF characteristics of healthy and disease controls |                                  |                    |                                    |                                |                       |                          |
|-------------------------------------------------------------------------------------------------------|----------------------------------|--------------------|------------------------------------|--------------------------------|-----------------------|--------------------------|
| Group                                                                                                 | Age<br>(median,<br>IQR)<br>years | Sex<br>(male<br>%) | Cerebrospinal Fluid                |                                |                       |                          |
|                                                                                                       |                                  |                    | WCC<br>>5<br>cells/ $\mu$ L<br>(n) | Protein<br>>45<br>mg/dL<br>(n) | hsCRP<br>>0.2<br>mg/L | D-dimer<br>>0.19<br>mg/L |
| Healthy<br>Controls<br>N=14                                                                           | 67.5<br>(51–75)                  | 57.1%              | 1/14                               | 6/14                           | 0/13                  | 3/11                     |
| Autoimmune<br>encephalitis<br>N=14                                                                    | 37.5<br>(23–53)                  | 42.8%              | 5/14                               | 3/14                           | 1/13                  | 1/8                      |
| Acute<br>meningitis<br>N=12                                                                           | 50.5<br>(28–67.5)                | 50%                | 11/12                              | 10/12                          | 0/9                   | 5/9                      |
| Acute<br>encephalitis<br>N=11                                                                         | 62<br>(32–65)                    | 54.5%              | 6/11                               | 7/11                           | 0/7                   | 3/6                      |
| Neuro-<br>Sarcoidosis<br>N=12                                                                         | 54<br>(47.5–65.5)                | 33.4%              | 7/12                               | 9/12                           | 0/10                  | 7/9                      |
| Neuro<br>Myelitis<br>Optica<br>N=11                                                                   | 33<br>(26–48)                    | 19%                | 6/11                               | 5/11                           | 0/7                   | 2/7                      |
| Stroke<br>N=8                                                                                         | 44<br>(39.5–50.5)                | 75%                | 3/8                                | 5/8                            | 0/8                   | 4/7                      |

| Supplemental Table 2.<br>Characteristics of the CSF as related with anti-SARS-CoV2 IgG and IgA antibodies |                           |                       |                       |                   |                   |       |                                           |                                           |
|-----------------------------------------------------------------------------------------------------------|---------------------------|-----------------------|-----------------------|-------------------|-------------------|-------|-------------------------------------------|-------------------------------------------|
| ID #                                                                                                      | COVID-19 Diagnostic Group | CSF WCC cell/ $\mu$ L | CSF RBC cell/ $\mu$ L | CSF Protein mg/dL | IgG index         | Q Alb | CSF Anti-SARS-Cov2 IgG Units <sup>A</sup> | CSF Anti-SARS-Cov2 IgA Units <sup>B</sup> |
| 1                                                                                                         | Stroke/SAH                | 313                   | 152000                | 56                | NA                | NA    | <b>3.68</b>                               | <b>10.26</b>                              |
| 2                                                                                                         | Stroke/ Ischemic          | 0                     | 15                    | 5.5               | NA                | NA    | 0.76                                      | 0.42                                      |
| 3                                                                                                         | Stroke/SAH                | 5                     | 2000                  | 85                | NA                | NA    | NA                                        | NA                                        |
| 5                                                                                                         | Stroke/ Ischemic/C- HIS   | 18                    | 6000                  | 277               | NA                | NA    | <b>12.29</b>                              | 0.76                                      |
| 7                                                                                                         | Stroke/ Ischemic/C-HIS    | 1                     | 0                     | 26                | 0.55 <sup>C</sup> | 3.65  | <b>29.54</b>                              | <b>10.26</b>                              |
| 9                                                                                                         | Stroke/ Ischemic and ICH  | 56                    | 2000                  | 63                | NA                | NA    | <b>5.11</b>                               | 0.47                                      |
| 4                                                                                                         | Encephalopathy/ C-HIS     | 1                     | 9                     | 54                | NA                | NA    | <b>6.80</b>                               | 1.38                                      |
| 6                                                                                                         | Encephalopathy/ C-HIS     | 25                    | 1000                  | 31                | NA                | NA    | <b>7.75</b>                               | <b>5.76</b>                               |
| 12                                                                                                        | Encephalopathy/ C-HIS     | 0                     | 0                     | 52                | NA                | NA    | <b>1.36</b>                               | 0.62                                      |
| 13                                                                                                        | Encephalopathy/ C-HIS     | 1                     | 99                    | 56                | 0.62 <sup>C</sup> | 7.95  | 0.66                                      | 0.90                                      |
| 15                                                                                                        | Encephalopathy            | 1                     | 0                     | 31                | 0.43 <sup>C</sup> | 3.84  | 0.03                                      | 0.30                                      |
| 16                                                                                                        | Encephalopathy            | 1                     | 160                   | 62                | 0.72 <sup>C</sup> | 8.88  | <b>4.12</b>                               | 1.59                                      |
| 17                                                                                                        | Encephalopathy            | 3                     | 0                     | 30                | 0.38              | 4.53  | <b>16.12</b>                              | 3.17                                      |
| 8                                                                                                         | Headache/other            | 1                     | 109                   | 23                | NA                | NA    | <b>3.76</b>                               | 0.50                                      |
| 10                                                                                                        | Headache/ other           | 3                     | 0                     | 33                | NA                | NA    | <b>1.60</b>                               | 0.13                                      |
| 11                                                                                                        | Headache/ other           | 0                     | 1                     | 35                | NA                | NA    | <b>2.93</b>                               | <b>5.04</b>                               |
| 14                                                                                                        | Headache/ other           | 3                     | 0                     | 27                | 0.52 <sup>C</sup> | 5.06  | <b>6.92</b>                               | 1.46                                      |
| 18                                                                                                        | Headache/ other           | 1                     | 27                    | 27                | 0.50              | 4.02  | 0.06                                      | 0.03                                      |

<sup>A</sup> Cutoff for IgG positivity at 1.23 units. Positive values are in bold.

<sup>B</sup> Cutoff for IgG positivity at 5.0 units. Positive values are in bold.

<sup>C</sup> Oligoclonal bands tested negative in CSF and serum

*Abbreviations:* SAH: subarachnoid hemorrhage; Q Alb: albumin quotient; ICH: intra-cerebral hemorrhage; C-HIS: COVID-19 hyper inflammatory syndrome

Supplemental Table 3.

**Percentage of detection of CSF biomarkers in CSF from COVID-19 and controls**

| <b>Analyte/Group</b><br>% analyte<br>detection         | <b>Healthy<br/>controls</b><br>(n=12 ) | <b>COVID-<br/>19</b><br>(n=18) | <b>Acute<br/>meningitis</b><br>(n=12 ) | <b>Autoimmune<br/>Encephalitis</b><br>(n=11) | <b>Acute<br/>Encephalitis</b><br>(n=11) | <b>NMO</b><br>(n=11) | <b>Neuro-<br/>Sarcoidosis</b><br>(n=11) | <b>Stroke</b><br>(n=8) |
|--------------------------------------------------------|----------------------------------------|--------------------------------|----------------------------------------|----------------------------------------------|-----------------------------------------|----------------------|-----------------------------------------|------------------------|
| <b>IL-6</b><br>(LLQ=0.017<br>pg/mL)                    | 12<br>100.0%                           | 18<br>100.0%                   | 12<br>100.0%                           | 10<br>90.9%                                  | 10<br>90.9%                             | 10<br>90.9%          | 11<br>100.0%                            | 6<br>75.0%             |
| <b>IL-10</b><br>(LLQ=0.03<br>pg/mL)                    | 10<br>83.3%                            | 15<br>83.3%                    | 10<br>83.3%                            | 9<br>81.8%                                   | 6<br>54.5%                              | 6<br>54.5%           | 11<br>100.0%                            | 4<br>50.0%             |
| <b>TNF<math>\alpha</math></b><br>(LLQ= 0.018<br>pg/mL) | 11<br>91.7%                            | 17<br>94.4%                    | 12<br>100.0%                           | 10<br>90.9%                                  | 9<br>81.8%                              | 9<br>81.8%           | 11<br>100.0%                            | 6<br>75.0%             |
| <b>IFN<math>\gamma</math></b><br>(LLQ=0.082<br>pg/mL)  | 11<br>91.7%                            | 16<br>88.9%                    | 11<br>91.7%                            | 10<br>90.9%                                  | 10<br>90.9%                             | 11<br>100.0%         | 11<br>100.0%                            | 7<br>87.5%             |
| <b>IL12p70</b><br>(LLQ=0.02<br>pg/mL)                  | 7<br>58.3%                             | 13<br>72.2%                    | 11<br>91.7%                            | 8<br>72.7%                                   | 6<br>54.5%                              | 7<br>63.6%           | 10<br>90.9%                             | 5<br>62.5%             |
| <b>IL-17A</b><br>(LLQ=0.003 pg<br>/mL)                 | 11<br>91.7%                            | 18<br>100.0%                   | 12<br>100.0%                           | 9<br>81.8%                                   | 9<br>81.8%                              | 10<br>90.9%          | 11<br>100.0%                            | 8<br>100.0%            |
| <b>NF-light</b><br>(LLQ= 1.6<br>pg/mL)                 | 12<br>100.0%                           | 18<br>100.0%                   | 12<br>100.0%                           | 10<br>90.9%                                  | 11<br>100.0%                            | 11<br>100.0%         | 11<br>100.0%                            | 8<br>100.0%            |
| <b>Ferritin</b><br>ng/mL                               | 11<br>91.7%                            | 17<br>94.4%                    | 9<br>75%                               | 10<br>90.9%                                  | 7<br>63.6%                              | 7<br>63.6%           | 9<br>81.8%                              | 7<br>87.5%             |
| <b>D-dimer</b><br>(LLQ= 0.19<br>mg/L                   | 10<br>83.3%                            | 15<br>83.3%                    | 9<br>75%                               | 6<br>54.5%                                   | 6<br>54.5%                              | 7<br>63.6%           | 8<br>72.7%                              | 8<br>100.0%            |
| <b>hs-CRP</b><br>(LLQ=0.2<br>mg/L                      | 11<br>91.7%                            | 17<br>94.4%                    | 9<br>75%                               | 10<br>90.9%                                  | 7<br>63.6%                              | 7<br>63.6%           | 9<br>81.8%                              | 8<br>100.0%            |

*Abbreviations:* LLQ: lower limit of quantification

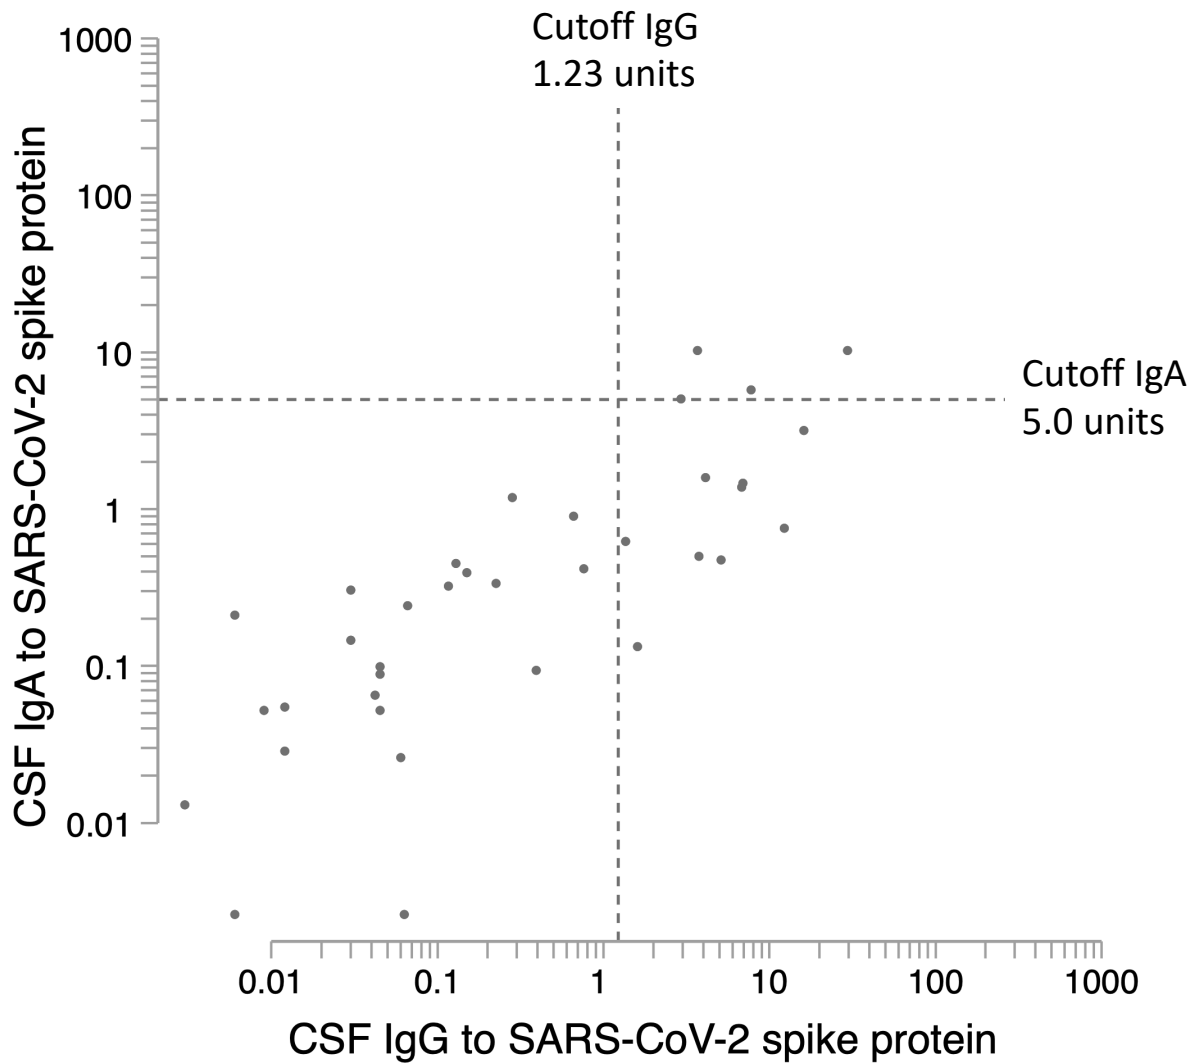

**Supplementary Figure 1.**

Scatter plot below distribution of the SARS-CoV2 IgG and IgA antibody measurements in the 37 CSF samples testes, 17 COVID-19 cases and 30 controls. Thirteen of 37 cases tested were positive, all of them COVID-19 cases. IgA was positive only in 4 of the 37 cases, and all of these 4 were also COVID-19 cases positive for IgG. The dotted line represents the cutoff for positivity: 1.23 units for IgG and 5 units for IgA. The scale is logarithmic.

Supplemental Table 4.  
Johns Hopkins Neuro-COVID-19 Group

| Name              |                | Location                                                                                                                            | Contribution                                                                                                 |
|-------------------|----------------|-------------------------------------------------------------------------------------------------------------------------------------|--------------------------------------------------------------------------------------------------------------|
| Andrew Agostini   | M.D.           | Department of Neurology, Johns Hopkins University School of Medicine.                                                               | Evaluation of patients, acquired clinical data, and revised the manuscript for intellectual content          |
| Mona Bahout       | M.D, Ph.D.     | Department of Neurology, Johns Hopkins University School of Medicine.                                                               | Evaluation of patients, acquired clinical data, and revised the manuscript for intellectual content          |
| Srishti Bhagat    | M.D.           | Department of Neurology, Johns Hopkins University School of Medicine.                                                               | Evaluation of patients, acquired clinical data, and revised the manuscript for intellectual content          |
| Pavan Bhargava    | M.B.B.S., M.D. | Department of Neurology, Johns Hopkins University School of Medicine.                                                               | Evaluation of patients, acquired clinical data, and revised the manuscript for intellectual content          |
| Sung-Min Cho      | D.O., M.H.S.   | Department of Neurology, Division of Cardiac Surgery, Cardiac Surgical Intensive Care, Johns Hopkins University School of Medicine. | Evaluation of patients, acquired clinical data, and revised the manuscript for intellectual content          |
| Camilo Diaz Cruz  | M.D.           | Department of Neurology, Johns Hopkins University School of Medicine.                                                               | Evaluation of patients, acquired clinical data, and revised the manuscript for intellectual content          |
| Sachin Gadani     | M.D, Ph.D.     | Department of Neurology, Johns Hopkins University School of Medicine.                                                               | Evaluation of patients, acquired clinical data,                                                              |
| Rebecca Gottesman | M.D. Ph.D.     | Department of Neurology, Johns Hopkins University School of Medicine.                                                               | Provided advice about study design, statistical analysis and revised the manuscript for intellectual content |
| Brittney M.Howard | M.S.           | Department of Pathology,                                                                                                            | Laboratory testing, acquired laboratory data and revised the                                                 |

|                     |                   |                                                                                                     |                                                                                                     |
|---------------------|-------------------|-----------------------------------------------------------------------------------------------------|-----------------------------------------------------------------------------------------------------|
|                     |                   | Johns Hopkins University School of Medicine                                                         | manuscript for intellectual content                                                                 |
| George Kannarkat    | M.D., Ph.D.       | Department of Neurology, Johns Hopkins University School of Medicine.                               | Evaluation of patients, acquired clinical data, and revised the manuscript for intellectual content |
| Amir Kheradmand     | M.D.              | Department of Neurology, Johns Hopkins University School of Medicine.                               | Evaluation of patients, acquired clinical data, and revised the manuscript for intellectual content |
| Michael Kornberg    | M.D., M.S., Ph.D. | Department of Neurology, Johns Hopkins University School of Medicine.                               | Evaluation of patients, acquired clinical data, and revised the manuscript for intellectual content |
| Rafael Llinas       | M.D               | Department of Neurology, Johns Hopkins University School of Medicine.                               | Evaluation of patients, acquired clinical data, and revised the manuscript for intellectual content |
| Justin McArthur     | M.B.B.S., M.P.H   | Department of Neurology, Johns Hopkins University School of Medicine.                               | Evaluation of patients, acquired clinical data, and revised the manuscript for intellectual content |
| Bipasha Mukherjee   | M.D.              | Department of Neurology, Johns Hopkins University School of Medicine.                               | Evaluation of patients, acquired clinical data, and revised the manuscript for intellectual content |
| John C. Probasco    | M.D               | Department of Neurology, Johns Hopkins University School of Medicine.                               | Evaluation of patients, acquired clinical data, and revised the manuscript for intellectual content |
| Alexandra Simpson   | M.D               | Department of Neurology, Johns Hopkins University School of Medicine.                               | Evaluation of patients, acquired clinical data, and revised the manuscript for intellectual content |
| Jose Ignacio Suarez | M.D               | Departments of Neurology and Neurosurgery, Anesthesiology and Critical Care Medicine, Johns Hopkins | Evaluation of patients, acquired clinical data, and revised the manuscript for intellectual content |

|                   |            |                                                                                                                                    |                                                                                                     |
|-------------------|------------|------------------------------------------------------------------------------------------------------------------------------------|-----------------------------------------------------------------------------------------------------|
|                   |            | University School of Medicine.                                                                                                     |                                                                                                     |
| Victor C. Urrutia | M.D.       | Department of Neurology, Johns Hopkins University School of Medicine.                                                              | Evaluation of patients, acquired clinical data, and revised the manuscript for intellectual content |
| Arun Venkatesan   | M.D. Ph.D. | Department of Neurology, Johns Hopkins University School of Medicine.                                                              | Evaluation of patients, acquired clinical data, and revised the manuscript for intellectual content |
| Wendy Ziai        | M.D        | Departments of Neurology and Neurosurgery, Anesthesiology and Critical Care Medicine, Johns Hopkins University School of Medicine. | Evaluation of patients, acquired clinical data, and revised the manuscript for intellectual content |
